# Supplementary material for: Capparis Spinosa L. promotes anti-inflammatory response in vitro through the control of cytokine gene expression in human peripheral blood mononuclear cells
Source: BMC Immunol. 2016 Aug 2;17:26. doi: 10.1186/s12865-016-0164-x (PMC4969972; doi:10.1186/s12865-016-0164-x)
Supplement: Additional file 3: — Raw data Figure 3. (XLSX 10 kb) [file 12865_2016_164_MOESM3_ESM.xlsx]

## Sheet: Feuil1
	anti-oxydant activity using DPPH scavengering activity
	extract(mg/ml)	DO1	DO2	DO3	moyen	A
	0.75	0.934	0.956		0.945	3.86572
	2	0.882	0.946	0.93	0.919333	6.47677
	2.5	0.845	0.833	0.849	0.842333	14.3099
	5	0.674	0.679	0.705	0.686	30.2136
	10	0.419	0.357	0.379	0.385	60.8342
	A°=	0.983
	y = 6,3653x - 2,6393
	R² = 0,9917
